# Supplementary material for: Enhanced ER-associated degradation of HMG CoA reductase causes embryonic lethality associated with Ubiad1 deficiency
Source: eLife. 2020 Mar 2;9:e54841. doi: 10.7554/eLife.54841 (PMC7069719; doi:10.7554/eLife.54841)
Supplement: Figure 3—figure supplement 1—source data 1. [file elife-54841-fig3-figsupp1-data1.xlsx]

## Sheet: Sheet1
Figure 3 - figure supplement 1A
	Sample	Hmgcr	Ubiad1	Body weight
Male	1	Ki/Ki	+/+	21.8
	2	Ki/Ki	+/+	25
	3	Ki/Ki	+/+	25.1
	4	Ki/Ki	+/+	23.8
	5	Ki/Ki	∆29/∆29	18.1
	6	Ki/Ki	∆29/∆29	17.1
	7	Ki/Ki	∆29/∆29	17.4
	8	Ki/Ki	∆29/∆29	18.1
Female	1	Ki/Ki	+/+	20.8
	2	Ki/Ki	+/+	15.2
	3	Ki/Ki	+/+	19
	4	Ki/Ki	+/+	18.4
	5	Ki/Ki	∆29/∆29	14.3
	6	Ki/Ki	∆29/∆29	15
	7	Ki/Ki	∆29/∆29	18.9
	8	Ki/Ki	∆29/∆29	16

## Sheet: Sheet2
Figure 3 - figure supplement 1B
				Chol	Trig
	Sample	Hmgcr	Ubiad1	(mg/g Liver)	(mg/g Liver)
Male	1	Ki/Ki	+/+	2.22587	7.30169
	2	Ki/Ki	+/+	2.21782	7.80289
	3	Ki/Ki	+/+	1.96393	8.02011
	4	Ki/Ki	+/+	2.0409	7.15056
	5	Ki/Ki	+/+	1.93504	9.83933
	6	Ki/Ki	+/∆172	2.02532	7.03447
	7	Ki/Ki	+/∆172	2.07639	7.13147
	8	Ki/Ki	+/∆172	2.02819	5.62654
	9	Ki/Ki	+/∆172	2.3293	8.70393
	10	Ki/Ki	+/∆172	2.203	7.0574
	11	Ki/Ki	∆172/∆172	1.94304	7.58744
	12	Ki/Ki	∆172/∆172	2.00685	8.70514
	13	Ki/Ki	∆172/∆172	2.08491	8.86944
	14	Ki/Ki	∆172/∆172	2.07371	9.84603
	15	Ki/Ki	∆172/∆172	2.29774	6.45302
Female	1	Ki/Ki	+/+	1.88337	9.7568
	2	Ki/Ki	+/+	2.45739	9.05441
	3	Ki/Ki	+/+	2.7907	18.486
	4	Ki/Ki	+/+	2.0985	7.88551
	5	Ki/Ki	+/+	2.90255	16.2591
	6	Ki/Ki	+/∆172	2.30787	11.3715
	7	Ki/Ki	+/∆172	2.56414	7.52563
	8	Ki/Ki	+/∆172	2.84381	17.3399
	9	Ki/Ki	+/∆172	2.28096	10.702
	10	Ki/Ki	+/∆172	2.64704	5.38019
	11	Ki/Ki	∆172/∆172	2.768	9.70742
	12	Ki/Ki	∆172/∆172	2.99807	7.00295
	13	Ki/Ki	∆172/∆172	2.69632	6.77454
	14	Ki/Ki	∆172/∆172	2.71241	7.41422
	15	Ki/Ki	∆172/∆172	3.0492	6.93242
