# Supplementary material for: Enhanced ER-associated degradation of HMG CoA reductase causes embryonic lethality associated with Ubiad1 deficiency
Source: eLife. 2020 Mar 2;9:e54841. doi: 10.7554/eLife.54841 (PMC7069719; doi:10.7554/eLife.54841)
Supplement: Figure 3—source data 1. [file elife-54841-fig3-data1.xlsx]

## Sheet: Sheet1
Fig 3A
	Sample	Hmgcr	Ubiad1	Body weight
Male	1	+/+	+/+	24.1
	2	+/+	+/+	23.7
	3	+/+	+/+	24.7
	4	+/+	+/+	25.1
	5	+/+	+/+	28.1
	6	+/+	+/∆172	27.3
	7	+/+	+/∆172	20.4
	8	+/+	+/∆172	27.9
	9	+/+	+/∆172	24.6
	10	+/+	+/∆172	25.1
Female	1	+/+	+/+	19
	2	+/+	+/+	17.8
	3	+/+	+/+	20.2
	4	+/+	+/+	21.1
	5	+/+	+/+	19.4
	6	+/+	+/∆172	21.6
	7	+/+	+/∆172	22.6
	8	+/+	+/∆172	21.3
	9	+/+	+/∆172	18.8
	10	+/+	+/∆172	19.2

## Sheet: Sheet2
Fig 3B
	Sample	Hmgcr	Ubiad1	Body weight
Male	1	Ki/Ki	+/+	23.2
	2	Ki/Ki	+/+	23.1
	3	Ki/Ki	+/+	23
	4	Ki/Ki	+/+	22.8
	5	Ki/Ki	+/+	26.5
	6	Ki/Ki	+/∆172	24.7
	7	Ki/Ki	+/∆172	23.3
	8	Ki/Ki	+/∆172	22.1
	9	Ki/Ki	+/∆172	22.4
	10	Ki/Ki	+/∆172	20.6
	11	Ki/Ki	∆172/∆172	18.5
	12	Ki/Ki	∆172/∆172	16.9
	13	Ki/Ki	∆172/∆172	17.1
	14	Ki/Ki	∆172/∆172	17.3
	15	Ki/Ki	∆172/∆172	16.4
Female	1	Ki/Ki	+/+	19.9
	2	Ki/Ki	+/+	18.1
	3	Ki/Ki	+/+	15.2
	4	Ki/Ki	+/+	17.2
	5	Ki/Ki	+/+	19.8
	6	Ki/Ki	+/∆172	14.8
	7	Ki/Ki	+/∆172	19.6
	8	Ki/Ki	+/∆172	21.8
	9	Ki/Ki	+/∆172	18.7
	10	Ki/Ki	+/∆172	19.7
	11	Ki/Ki	∆172/∆172	14.4
	12	Ki/Ki	∆172/∆172	14.9
	13	Ki/Ki	∆172/∆172	13.5
	14	Ki/Ki	∆172/∆172	15.8
	15	Ki/Ki	∆172/∆172	16.4

## Sheet: Sheet3
Fig 3C
				Weeks of age
	Sample	Hmgcr	Ubiad1	4	5	6	7	8	9	10	11.7
Male	1	Ki/Ki	+/+	16.9	19.4	21.2	23.6	25	25.7	26.4	28.7
	2	Ki/Ki	+/+	17.6	20.5	23.2	25.3	26.7	26.9	28.8	30
	3	Ki/Ki	+/+	18.5	21.7	23.3	24.9	24.8	25.2	25.9	26.9
	4	Ki/Ki	+/+	18.5	21.3	23.6	25.2	26.3	26.7	27.9	29.3
	5	Ki/Ki	+/+	18	20.5	22.4	23.9	24.4	24.9	26	26.9
	6	Ki/Ki	+/+	14.4	17.7	19.2	21.2	22.1	23.4	24.3	25.4
	7	Ki/Ki	+/∆172	17	19.5	20.4	21.8	23.2	23.3	24.4	25.8
	8	Ki/Ki	+/∆172	17.1	20.5	23.7	26.1	28	29.2	32.4	33.1
	9	Ki/Ki	+/∆172	17.7	20.6	23.2	25.4	26.8	27.5	29.8	31.9
	10	Ki/Ki	+/∆172	15.3	20.4	22.5	24	26.3	26.2	28	29.5
	11	Ki/Ki	+/∆172	14.9	18.5	21.5	23.5	25.6	26	26.9	28.1
	12	Ki/Ki	+/∆172	15	20.2	21.7	23.1	23.9	24.2	26.1	26.6
	13	Ki/Ki	∆172/∆172	15.4	17.6	18.8	18.8	20.4	19.2	19.5	18.4
	14	Ki/Ki	∆172/∆172	15.4	17.4	18.6	19.2	20.4	19.2	19.7	18.9
	15	Ki/Ki	∆172/∆172	14.1	16.4	16.8	17.3	18.6	17.6	18.1	17.6
	16	Ki/Ki	∆172/∆172	13.2	15.9	18	17.3	18.5	17	17.6	16.8
Female	1	Ki/Ki	+/+	13.6	16.4	16.5	19.1	18.4	18.6	20.1	19.9
	2	Ki/Ki	+/+	14.7	17.3	17.9	19.9	21.3	20.9	22.6	23
	3	Ki/Ki	+/+	14.2	17.2	17.4	19	18.8	18.8	20.2	19.6
	4	Ki/Ki	+/+	14.2	17.7	18.2	19.3	19.7	20.5	21.5	21.5
	5	Ki/Ki	+/∆172	14.2	16.5	17.2	18	18.5	19.3	21.1	22.3
	6	Ki/Ki	+/∆172	14.6	16.6	17.8	18.3	18.8	19.5	20.1	20.6
	7	Ki/Ki	+/∆172	12.4	15.9	17.1	18.1	18.3	19.3	20.2	19.9
	8	Ki/Ki	∆172/∆172	10	12.7	13.9	13.5	13.9	14.1	14.5	14.4
	9	Ki/Ki	∆172/∆172	13.8	15.8	16.4	16.4	16.3	16.2	16.1	15.6
	10	Ki/Ki	∆172/∆172	11.8	13.4	13.8	15.2	15.5	15.1	15.9	15.2
	11	Ki/Ki	∆172/∆172	14.7	16.3	16.5	16.4	16.9	16.2	16.7	16.3
	12	Ki/Ki	∆172/∆172	14.5	15.8	15.4	15.1	15.4	15.1	15.4	15.1
