# Supplementary material for: Enhanced ER-associated degradation of HMG CoA reductase causes embryonic lethality associated with Ubiad1 deficiency
Source: eLife. 2020 Mar 2;9:e54841. doi: 10.7554/eLife.54841 (PMC7069719; doi:10.7554/eLife.54841)
Supplement: Figure 4—figure supplement 1—source data 1. [file elife-54841-fig4-figsupp1-data1.xlsx]

## Sheet: Sheet1
Figure 4 - figure supplement 1A
Female	Sample	Hmgcr	Ubiad1	Chol(mg/dL)	TG(mg/dL)	NEFA (mEq/L)	AST(U/L)	ALT(U/L)	ALKP(U/L)
	1	Ki/Ki	+/+	92	88	1.0786	71	53	142
	2	Ki/Ki	+/+	111	103	1.11154	89	83	142
	3	Ki/Ki	+/+	103	117	1.08331	63	45	129
	4	Ki/Ki	+/+	120	100	1.03625	68	39	146
	5	Ki/Ki	∆172/∆172	92	163	1.42213	371	101	89
	6	Ki/Ki	∆172/∆172	92	156	1.77508	417	105	120
	7	Ki/Ki	∆172/∆172	91	128	1.57743	315	72	72
	8	Ki/Ki	∆172/∆172	96	120	1.2386	351	79	78
Figure 4 - figure supplement 1B
Female	Sample	Hmgcr	Ubiad1	AST (U/L)	ALT (U/L)	CK (U/L)	LDH (U/L)	LIPA (U/L)	AMYL (U/L)	ALB (g/dL)
	1	Ki/Ki	+/+	53	41	133	767	1099	2795	3.2
	2	Ki/Ki	+/+	43	39	45	641	1061	2458	2.9
	3	Ki/Ki	+/+	33	40	49	752	963	2497	3
	4	Ki/Ki	+/+	81	-	574	1988	1440	2976	5
	5	Ki/Ki	+/+	44	41	51	1032	1178	2480	2.9
	6	Ki/Ki	+/+	59	43	176	1451	1130	2700	3.2
	7	Ki/Ki	+/+	60	41	164	1757	1174	2718	3.1
	8	Ki/Ki	+/+	60	37	116	1051	1207	2522	2.8
	9	Ki/Ki	+/+	125	89	327	2778	1138	2734	3.1
	10	Ki/Ki	+/+	57	40	123	1663	1191	2639	3.2
	11	Ki/Ki	∆172/∆172	308	78	889	2480	861	1992	3.2
	12	Ki/Ki	∆172/∆172	225	77	741	1873	-	-	3
	13	Ki/Ki	∆172/∆172	392	138	812	5074	-	2415	3.2
	14	Ki/Ki	∆172/∆172	247	66	673	1552	917	2312	3
	15	Ki/Ki	∆172/∆172	375	61	685	2696	1045	2351	2.5
	16	Ki/Ki	∆172/∆172	277	61	704	1739	1011	2133	3.1
	17	Ki/Ki	∆172/∆172	300	-	665	3229	1011	2251	3.1
	18	Ki/Ki	∆172/∆172	234	70	828	2824	839	2276	3.2
	19	Ki/Ki	∆172/∆172	285	73	845	2295	-	2405	-
	20	Ki/Ki	∆172/∆172	205	139	579	2235	901	2174	-
	21	Ki/Ki	∆172/∆172	223	81	454	2376	927	2053	3.2
	22	Ki/Ki	∆172/∆172	251	65	661	2749	900	2169	3.2
	23	Ki/Ki	∆172/∆172	-	-	681	3163	1017	2333	3.3
