# Supplementary material for: Enhanced ER-associated degradation of HMG CoA reductase causes embryonic lethality associated with Ubiad1 deficiency
Source: eLife. 2020 Mar 2;9:e54841. doi: 10.7554/eLife.54841 (PMC7069719; doi:10.7554/eLife.54841)
Supplement: Figure 4—source data 1. [file elife-54841-fig4-data1.xlsx]

## Sheet: Sheet1
Figure 4B
			pmol/g tissue
			Pancreas	Right Brain	Left Brain	iWAT	eWAT	BAT	Kidney	Spleen	Liver
Sample	Hmgcr	Ubiad1	MK-4	MK-4	MK-4	MK-4	MK-4	MK-4	MK-4	MK-4	MK-4
1	Ki/Ki	+/+	3925	1934	1394	1085	1497	846	490	204	79.2
2	Ki/Ki	+/+	3636	1563	1813	1351	1357	408	580	188	80
3	Ki/Ki	+/+	3098	1726	1573	1559	876	1030	516	169	69.7
4	Ki/Ki	+/+	3292	1606	1755	1188	775	995	516	224	73.3
5	Ki/Ki	∆172/∆172	2.5	1.7	0	0	0	0	0	0	0
6	Ki/Ki	∆172/∆172	1.3	0	0	0	0	0	0	0	0
7	Ki/Ki	∆172/∆172	1.5	0	0	0	0	0	0	0	0
8	Ki/Ki	∆172/∆172	0.8	0	0	0	0	0	0	0	0

## Sheet: Sheet2
Figure 4C
	Sample	Hmgcr	Ubiad1	Chol(mg/dL)	TG(mg/dL)	NEFA (mEq/L)	AST(U/L)	ALT(U/L)	ALKP(U/L)
Male	1	Ki/Ki	+/+	135	128	0.713675	65	40	103
	2	Ki/Ki	+/+	148	156	0.756952	74	63	101
	3	Ki/Ki	+/+	126	138	0.631931	70	43	88
	4	Ki/Ki	+/+	141	127	0.69925	76	35	95
	5	Ki/Ki	+/+	124	116	0.627122	64	41	104
	6	Ki/Ki	+/+	126	113	0.579037	58	38	113
	7	Ki/Ki	∆172/∆172	119	181	1.04546	353	72	56
	8	Ki/Ki	∆172/∆172	135	179	0.732909	367	82	72
	9	Ki/Ki	∆172/∆172	120	244	0.910824	476	53	64
	10	Ki/Ki	∆172/∆172	112	202	1.2378	386	95	73

## Sheet: Sheet3
Figure 4D
	Sample	Hmgcr	Ubiad1	AST (U/L)	ALT (U/L)	CK (U/L)	LDH (U/L)	LIPA (U/L)	AMYL (U/L)	ALB (g/dL)
Male	1	Ki/Ki	+/+	62	41	93	1455	1091	3211	3.4
	2	Ki/Ki	+/+	54	46	204	1279	1033	2795	2.9
	3	Ki/Ki	+/+	53	-	57	1393	824	2850	2.7
	4	Ki/Ki	+/+	57	42	191	1178	1097	2586	2.8
	5	Ki/Ki	+/+	63	39	171	801	1089	2511	2.7
	6	Ki/Ki	+/+	48	36	124	1874	950	2795	2.8
	7	Ki/Ki	+/+	66	49	169	1539	1178	3299	2.8
	8	Ki/Ki	+/+	54	46	64	1172	888	2839	2.6
	9	Ki/Ki	+/+	87	41	931	-	1109	2552	3.4
	10	Ki/Ki	+/+	56	41	128	1813	1031	2816	3.1
	11	Ki/Ki	∆172/∆172	526	79	2426	3425	859	2336	2.9
	12	Ki/Ki	∆172/∆172	320	-	1209	2951	813	2205	3.1
	13	Ki/Ki	∆172/∆172	112	-	1147	-	916	2355	3.6
	14	Ki/Ki	∆172/∆172	379	75	1083	3706	894	2309	2.8
	15	Ki/Ki	∆172/∆172	315	70	1226	2745	776	2700	3
	16	Ki/Ki	∆172/∆172	288	77	1201	4122	807	2341	3.1
	17	Ki/Ki	∆172/∆172	253	68	985	2361	827	2549	3
	18	Ki/Ki	∆172/∆172	266	65	871	2710	810	2109	3.1
	19	Ki/Ki	∆172/∆172	356	82	944	2906	834	2179	3.2
	20	Ki/Ki	∆172/∆172	280	80	756	3039	755	1843	3.1
	21	Ki/Ki	∆172/∆172	240	74	640	2335	817	2332	2.8
